# Supplementary material for: Long‐term response of wetland plant communities to management intensity, grazing abandonment, and prescribed fire
Source: PubMed Central journal article supplement — Ecol Appl. 2022 Nov 6;33(1):e2732. doi: 10.1002/eap.2732 (PMC10078234; doi:10.1002/eap.2732), 2022-11-06
Supplement: EAP-33-0-s002.pdf [file EAP-33-0-s002.pdf]

## Appendix S2

Sonnier, G., E.H. Boughton, and R.E. Whittington. Long-term response of wetland plant communities to management intensity, grazing abandonment, and prescribed fire. *Ecological Applications*.

**Table S1.** Summary of linear mixed effect models testing the effect of pasture type, grazing treatment, and burning treatment on total species richness, native species richness, non-native species richness and non-native incidence (%).

| <i>Predictors</i>                                       | Total species richness |                  |                | Native richness  |                  |                | Non-native richness |                  |                | Non-native incidence (%) |                    |                |
|---------------------------------------------------------|------------------------|------------------|----------------|------------------|------------------|----------------|---------------------|------------------|----------------|--------------------------|--------------------|----------------|
|                                                         | <i>Estimates</i>       | <i>CI</i>        | <i>p</i>       | <i>Estimates</i> | <i>CI</i>        | <i>p</i>       | <i>Estimates</i>    | <i>CI</i>        | <i>p</i>       | <i>Estimates</i>         | <i>CI</i>          | <i>p</i>       |
| (Intercept)                                             | 25.25                  | 21.91 –<br>28.59 | < <b>0.001</b> | 20.51            | 17.01 –<br>24.02 | < <b>0.001</b> | 4.75                | 4.07 –<br>5.43   | < <b>0.001</b> | 25.32                    | 20.89 –<br>29.75   | < <b>0.001</b> |
| Pasture type<br>[SNP]                                   | 6.78                   | 3.62 –<br>9.95   | < <b>0.001</b> | 9.08             | 5.76 –<br>12.40  | < <b>0.001</b> | -2.05               | -2.73 –<br>-1.38 | < <b>0.001</b> | -17.51                   | -21.84 –<br>-13.17 | < <b>0.001</b> |
| Grazing<br>Treatment<br>[Grazed]                        | 3.26                   | 0.10 –<br>6.43   | <b>0.04</b>    | 3.03             | -0.29 –<br>6.35  | 0.07           | 0.23                | -0.45 –<br>0.90  | 0.51           | -2.69                    | -7.03 –<br>1.64    | 0.22           |
| Burning<br>Treatment<br>[Unburn]                        | -1.80                  | -4.96 –<br>1.37  | 0.27           | -1.28            | -4.60 –<br>2.04  | 0.45           | -0.61               | -1.28 –<br>0.07  | 0.08           | -0.08                    | -4.42 –<br>4.25    | 0.97           |
| Observations                                            | 400                    |                  |                | 400              |                  |                | 369                 |                  |                | 400                      |                    |                |
| Marginal R <sup>2</sup> /<br>Conditional R <sup>2</sup> | 0.229 / 0.633          |                  |                | 0.314 / 0.714    |                  |                | 0.335 / 0.644       |                  |                | 0.515 / 0.833            |                    |                |

**Table S2.** Summary of linear mixed effect models testing the effect of pasture type, grazing treatment, and burning treatment on the exponential of Shannon diversity, Pielou index, and mean coefficient of conservatism.

| <i>Predictors</i>                                          | <b>Shannon diversity index (H')</b> |               |                  | <b>Pielou index</b> |               |                  | <b>Mean coefficient of conservatism</b> |              |                  |
|------------------------------------------------------------|-------------------------------------|---------------|------------------|---------------------|---------------|------------------|-----------------------------------------|--------------|------------------|
|                                                            | <i>Estimates</i>                    | <i>CI</i>     | <i>p</i>         | <i>Estimates</i>    | <i>CI</i>     | <i>p</i>         | <i>Estimates</i>                        | <i>CI</i>    | <i>p</i>         |
| (Intercept)                                                | 17.79                               | 15.23 – 20.36 | <b>&lt;0.001</b> | 0.88                | 0.87 – 0.89   | <b>&lt;0.001</b> | 2.59                                    | 2.26 – 2.92  | <b>&lt;0.001</b> |
| Pasture type [SNP]                                         | 5.59                                | 3.14 – 8.03   | <b>&lt;0.001</b> | 0.04                | 0.02 – 0.05   | <b>&lt;0.001</b> | 1.34                                    | 1.01 – 1.66  | <b>&lt;0.001</b> |
| Grazing treatment [Grazed]                                 | 2.74                                | 0.30 – 5.19   | <b>0.03</b>      | 0.02                | 0.01 – 0.04   | <b>&lt;0.001</b> | 0.20                                    | -0.13 – 0.53 | 0.23             |
| Burning treatment [Unburn]                                 | -1.54                               | -3.99 – 0.90  | 0.22             | 0.01                | -0.00 – 0.03  | 0.07             | 0.07                                    | -0.25 – 0.40 | 0.66             |
| Pasture type *<br>Grazing treatment                        |                                     |               |                  | -0.02               | -0.04 – -0.00 | <b>0.03</b>      |                                         |              |                  |
| Pasture type *<br>Burning treatment                        |                                     |               |                  | -0.03               | -0.05 – -0.01 | <b>&lt;0.001</b> |                                         |              |                  |
| Grazing treatment *<br>Burning treatment                   |                                     |               |                  | -0.02               | -0.04 – 0.00  | 0.07             |                                         |              |                  |
| Pasture type *<br>Grazing treatment *<br>Burning treatment |                                     |               |                  | 0.03                | 0.01 – 0.06   | <b>0.02</b>      |                                         |              |                  |
| Observations                                               | 400                                 |               |                  | 400                 |               |                  | 400                                     |              |                  |

Marginal  $R^2$ / Conditional  
 $R^2$  0.259 / 0.654

0.238 / 0.399

0.574 / 0.925

---

**Table S3.** Summary of linear mixed effect models testing the effect of pasture type, grazing treatment, and burning treatment on forb incidence (%), graminoid incidence (%) and tree and shrub incidence (%).

| <i>Predictors</i>                                    | <b>Forb incidence (%)</b> |               |          | <b>Graminoid incidence (%)</b> |              |          | <b>Tree/shrub incidence (%)</b> |              |          |
|------------------------------------------------------|---------------------------|---------------|----------|--------------------------------|--------------|----------|---------------------------------|--------------|----------|
|                                                      | <i>Estimates</i>          | <i>CI</i>     | <i>p</i> | <i>Estimates</i>               | <i>CI</i>    | <i>p</i> | <i>Estimates</i>                | <i>CI</i>    | <i>p</i> |
| (Intercept)                                          | 54.64                     | 51.64 –       | <0.001   | 42.03                          | – 44.94      | <0.001   | 1.55                            | 0.43 –       | 0.01     |
| Pasture type [SNP]                                   | -6.76                     | -9.47 – -4.04 | <0.001   | 5.13                           | 2.65 –       | <0.001   | 1.69                            | 0.58 –       | <0.001   |
| Grazing treatment [Grazed]                           | 0.33                      | -2.38 – 3.05  | 0.81     | 2.23                           | -0.25 – 4.71 | 0.08     | -1.07                           | -2.18 – 0.03 | 0.06     |
| Burning treatment [Unburn]                           | 1.86                      | -0.85 – 4.58  | 0.18     | -1.79                          | -4.27 – 0.69 | 0.16     | -0.07                           | -1.18 – 1.03 | 0.90     |
| Observations                                         | 400                       |               |          |                                |              |          |                                 |              |          |
| Marginal R <sup>2</sup> / Conditional R <sup>2</sup> | 0.182 / 0.478             |               |          | 0.140 / 0.442                  |              |          | 0.133 / 0.523                   |              |          |

**Table S4.** Summary of linear models testing the effect of pasture type, grazing treatment, and burning treatment on rate of community change (unitless) and mean rank shift (unitless).

| <i>Predictors</i>          | <b>Rate of community change</b> |               |                  | <b>Mean rank shift</b> |              |                  |
|----------------------------|---------------------------------|---------------|------------------|------------------------|--------------|------------------|
|                            | <i>Estimates</i>                | <i>CI</i>     | <i>p</i>         | <i>Estimates</i>       | <i>CI</i>    | <i>p</i>         |
| (Intercept)                | 0.59                            | 0.44 – 0.74   | <b>&lt;0.001</b> | 3.05                   | 2.54 – 3.56  | <b>&lt;0.001</b> |
| Pasture type [SNP]         | -0.02                           | -0.18 – 0.13  | 0.754            | 1.20                   | 0.68 – 1.71  | <b>&lt;0.001</b> |
| Grazing treatment [Grazed] | -0.37                           | -0.52 – -0.22 | <b>&lt;0.001</b> | 0.53                   | 0.01 – 1.04  | <b>0.044</b>     |
| Burning treatment [Unburn] | 0.04                            | -0.11 – 0.19  | 0.583            | -0.21                  | -0.73 – 0.30 | 0.419            |
| Observations               | 40                              |               |                  | 40                     |              |                  |
| R <sup>2</sup>             | 0.37                            |               |                  | 0.40                   |              |                  |

**Table S5.** Summary of linear mixed effect models testing the effect of pasture type, grazing treatment, and burning treatment on functional dispersion and community weighted mean of SLA (cm<sup>2</sup>/g), LDMC (mg/g) and Plant height (cm).

| <i>Predictors</i>                                       | <b>Functional Dispersion</b> |               |                  | <b>SLA (cm<sup>2</sup>/g)</b> |                 |                  | <b>LDMC (mg/g)</b> |                 |                  | <b>Plant Height (cm)</b> |                |                  |
|---------------------------------------------------------|------------------------------|---------------|------------------|-------------------------------|-----------------|------------------|--------------------|-----------------|------------------|--------------------------|----------------|------------------|
|                                                         | <i>Estimates</i>             | <i>CI</i>     | <i>p</i>         | <i>Estimates</i>              | <i>CI</i>       | <i>p</i>         | <i>Estimates</i>   | <i>CI</i>       | <i>p</i>         | <i>Estimates</i>         | <i>CI</i>      | <i>p</i>         |
| (Intercept)                                             | 1.26                         | 1.20 – 1.32   | <b>&lt;0.001</b> | 249.32                        | 238.59 – 260.05 | <b>&lt;0.001</b> | 229.62             | 221.74 – 237.51 | <b>&lt;0.001</b> | 65.27                    | 61.63 – 68.91  | <b>&lt;0.001</b> |
| Pasture type [SNP]                                      | -0.01                        | -0.06 – 0.05  | 0.78             | -34.36                        | -44.76 – 23.95  | <b>&lt;0.001</b> | 10.85              | 3.20 – 18.50    | <b>0.005</b>     | -2.09                    | -5.35 – 1.16   | 0.21             |
| Grazing treatment [Grazed]                              | 0.06                         | -0.02 – 0.14  | 0.14             | -0.95                         | -11.36 – 9.45   | 0.86             | -2.41              | -10.06 – 5.25   | 0.54             | -7.86                    | -11.11 – -4.60 | <b>&lt;0.001</b> |
| Burning treatment [Unburn]                              | -0.10                        | -0.18 – -0.02 | <b>0.018</b>     | -3.01                         | -13.42 – 7.39   | 0.57             | 0.65               | -7.00 – 8.30    | 0.87             | -3.00                    | -6.26 – 0.25   | 0.07             |
| Grazing treatment *<br>Burning treatment                | 0.11                         | -0.00 – 0.22  | 0.05             |                               |                 |                  |                    |                 |                  |                          |                |                  |
| Observations                                            | 400                          |               |                  | 400                           |                 |                  | 400                |                 |                  | 400                      |                |                  |
| Marginal R <sup>2</sup> /<br>Conditional R <sup>2</sup> | 0.22 / 0.58                  |               |                  | 0.40 / 0.79                   |                 |                  | 0.10 / 0.60        |                 |                  | 0.27 / 0.73              |                |                  |
